# Supplementary material
Source: Springer Nature journal article supplement (https://www.springermedizin.de/resource/supplementary/12871_2013_348_MOESM3_ESM.pdf/9429080)
Supplement: MOESM3 [file 9429080]

AUROC curves for severity criteria created by adding further clinical variables to the CURB65 score

| Proposed severity criteria                                        | Area under ROC curve (95% confidence intervals) |                  |
|-------------------------------------------------------------------|-------------------------------------------------|------------------|
|                                                                   | 30 day mortality                                | 90 day mortality |
| <b>CURB65 + medical ward (W)</b>                                  | 0.75 (0.70-0.80)                                | 0.74 (0.70-0.78) |
| <b>CURB65 + emergency admission (A)</b>                           | 0.75 (0.70-0.79)                                | 0.75 (0.71-0.79) |
| <b>CURB65 + prior length of stay <math>\geq</math>21 days (L)</b> | 0.73 (0.68-0.77)                                | 0.72 (0.68-0.77) |
| <b>CURB65 + W + A</b>                                             | 0.77 (0.72-0.81)                                | 0.76 (0.72-0.80) |
| <b>CURB65 + W + L</b>                                             | 0.76 (0.71-0.80)                                | 0.75 (0.71-0.79) |
| <b>CURB65 + A + L</b>                                             | 0.75 (0.71-0.80)                                | 0.75 (0.71-0.79) |
| <b>CURB65 + W + A + L</b>                                         | 0.77 (0.73-0.82)                                | 0.77 (0.73-0.81) |

p<0.001 in all instances
